# Supplementary material for: Life-cycle assessment of transportation biofuels from hydrothermal liquefaction of forest residues in British Columbia
Source: PubMed Central journal article supplement (PMC5797420; doi:10.1186/s13068-018-1019-x), 2018-02-03
Supplement: 13068_2018_1019_MOESM1_ESM.pdf [file 13068_2018_1019_MOESM1_ESM.pdf]

## Additional file 1 - Review of LCA studies

Table 1. Review of LCA studies on thermochemical conversion of lignocellulosic biomass to transportation biofuels

| Conversion pathway | Reference | Published year | Region | System boundary | Facility capacity   | Functional unit (FU) | Software                | Feedstock | Focused product                  | LC GHG Emissions (g CO <sub>2</sub> eq/FU)                                  |
|--------------------|-----------|----------------|--------|-----------------|---------------------|----------------------|-------------------------|-----------|----------------------------------|-----------------------------------------------------------------------------|
| Gasification       | [1]       | 2007           | Europe | WTW             | 200 MW              | MJ of fuel           | E <sup>3</sup> database | FR        | Diesel                           | 4.8                                                                         |
|                    | [2]       | 2008           | US     | WTWa            | N/A                 | MJ of fuel           | REET                    | FR; CS    | Jet                              | FR:11.6; CS:5.4                                                             |
|                    | [3]       | 2009           | Europe | WTW             | N/A                 | km                   | Excel                   | FR        | Diesel                           | 90                                                                          |
|                    | [4]       | 2010           | US     | WTWa            | 300 barrel/day      | MJ of fuel           | REET                    | FR; SG    | Jet                              | FR:12.2; SG: 17.7                                                           |
|                    | [5]       | 2010           | Europe | WTT             | N/A                 | MJ of fuel           | REET                    | SG        | Diesel                           | 21.6                                                                        |
|                    | [6]       | 2013           | US     | WTWa            | 3000 dry tonne /day | MJ of fuel           | REET                    | CS        | Jet                              | 10.1                                                                        |
| Pyrolysis          | [7]       | 2011           | US     | WTW             | 200 tonne/day       | Hectare of land      | REET                    | CS        | Gasoline                         | -2.99E+06                                                                   |
|                    | [8]       | 2011           | US     | WTW             | 2000 dry tonne/day  | MJ of fuel           | REET                    | FR        | Gasoline                         | 42.90                                                                       |
|                    | [9]       | 2012           | US     | WTW             | 2000 dry tonne/day  | MJ of fuel           | SimaPro and REET        | FR        | Gasoline and diesel              | G: 39; D: 39                                                                |
|                    | [10]      | 2012           | N/A    | WTT             | 500 dry tonne /day  | MJ of fuel           | SimaPro                 | SRP       | Gasoline and diesel              | -50.54                                                                      |
|                    | [6]       | 2013           | US     | WTWa            | 2000 dry tonne/day  | MJ of fuel           | REET                    | CS        | Jet                              | 29.4 <sup>a</sup> /22.1 <sup>b</sup>                                        |
|                    | [11]      | 2013           | US     | WTW             | 2000 dry tonne/day  | MJ of fuel           | REET                    | FR; CS    | Gasoline                         | FR: 38 <sup>c</sup> ; CS: (10 <sup>a</sup> /-16 <sup>b</sup> ) <sup>d</sup> |
|                    | [12]      | 2014           | US     | WTW             | 2000 dry tonne/day  | MJ of fuel           | SimaPro and REET        | LR&FT     | Gasoline and diesel              | G: 33.8; D: 34.0                                                            |
|                    | [13]      | 2014           | N/A    | WTT             | 2000 dry tonne/day  | MJ of fuel           | REET                    | CS        | Gasoline and diesel              | 28.82 <sup>e</sup> ; 25.15 <sup>f</sup> ; -18.13 <sup>g</sup>               |
| [14]               | 2017      | US             | WTW    | N/A             | MJ of fuel          | REET                 | FR                      | Jet       | 22 <sup>h</sup> ;37 <sup>i</sup> |                                                                             |
| HTL                | [12]      | 2014           | US     | WTW             | 2000 dry tonne/day  | MJ of fuel           | SimaPro and REET        | LR&FT     | Gasoline and diesel              | G: 27.2; D: 27.3                                                            |
|                    | [14]      | 2017           | US     | WTW             | N/A                 | MJ of fuel           | REET                    | FR        | Jet                              | 18 <sup>h</sup> ;20 <sup>i</sup>                                            |

Note: WTWa=Well-to-wake; WTW=Well-to-wheel; WTT=Well-to-Tank; FR=Forest residue; CS=Corn stover; SG=Switchgrass; SRP=Short Rotation Polar; LR&FT=Logging residues and forest thinnings; G: gasoline; D: diesel;<sup>a</sup> Byproduct bio-char is used for power generation; <sup>b</sup> Byproduct bio-char is used for soil amendment; <sup>c</sup> H<sub>2</sub> is from fuel gas reforming; <sup>d</sup> H<sub>2</sub> is from pyrolysis oil reforming; <sup>e</sup> Hydrogen comes from external NG reforming, and biofuel yield is 43.5%; <sup>f</sup> Hydrogen comes from steam reforming of 35% bio-oil, and biofuel yield is 33.1%; <sup>g</sup> Hydrogen comes from steam reforming of 100% bio-oil, and biofuel yield is 16.1%; <sup>h</sup> In-situ hydrogen production via steam reforming of process off-gases; <sup>i</sup> Ex-situ hydrogen production via steam reforming of natural gas.

## Reference

1. Edwards R, Larive J-F, Mahieu V, Rounveiolles P. Well-to-wheels analysis of alternative fuels and powertrains in the European context Version 2c. JRC. 2007.
2. Wong HM. Life-cycle assessment of greenhouse gas emissions from alternative jet fuels. Massachusetts Institute of Technology; 2008.
3. van Vliet OPR, Faaij APC, Turkenburg WC. Fischer-Tropsch diesel production in a well-to-wheel perspective: A carbon, energy flow and cost analysis. *Energy Convers. Manag.* Elsevier Ltd; 2009;50:855–76.
4. Stratton RW, Min Wong H, Hileman JJ. Life cycle greenhouse gas emissions from alternative jet fuels. 2010;571:1–133.
5. Hoefnagels R, Smeets E, Faaij A. Greenhouse gas footprints of different biofuel production systems. *Renew. Sustain. Energy Rev.* 2010;14:1661–94.
6. Han J, Elgowainy A, Cai H, Wang MQ. Life-cycle analysis of bio-based aviation fuels. *Bioresour. Technol.* 2013;150:447–56.
7. Kauffman N, Hayes D, Brown R. A life cycle assessment of advanced biofuel production from a hectare of corn. *Fuel.* 2011;90:3306–14.
8. Han J, Elgowainy A, Palou-Rivera I, Dunn JB, Wang MQ. Well-to-wheels analysis of fast pyrolysis pathways with GREET. 2011.
9. Hsu DD. Life cycle assessment of gasoline and diesel produced via fast pyrolysis and hydroprocessing. *Biomass and Bioenergy.* 2012;45:41–7.
10. Iribarren D, Peters JF, Dufour J. Life cycle assessment of transportation fuels from biomass pyrolysis. *Fuel.* 2012;97:812–21.
11. Han J, Elgowainy A, Dunn JB, Wang MQ. Life cycle analysis of fuel production from fast pyrolysis of biomass. *Bioresour. Technol.* 2013;133:421–8.
12. Tews IJ, Zhu Y, Drennan CV, Elliott D., Snowden-Swan LJ, Onarheim K, et al. Biomass direct liquefaction options: techno-economic and life cycle assessment. PNNL. Richland; 2014.
13. Dang Q, Yu C, Luo Z. Environmental life cycle assessment of bio-fuel production via fast pyrolysis of corn stover and hydroprocessing. *Fuel.* 2014;131:36–42.
14. de Jong S, Antonissen K, Hoefnagels R, Lonza L, Wang M, Faaij A, et al. Life-cycle analysis of greenhouse gas emissions from renewable jet fuel production. *Biotechnol. Biofuels.* 2017;10:64.
